# Supplementary material for: Coordination behaviour of new open chain and macrocyclic peptidomimetic compounds with copper(ii)
Source: Royal Society of Chemistry journal article supplement (doi:10.1039/c5ra15852d), 2015-01-01
Supplement: c5ra15852d1.pdf [file c5ra15852d1.pdf]

**Supporting Information**

---

**Coordination behaviour of new open chain and macrocyclic  
peptidomimetic compounds with copper(II).**

**Prashant D. Wadhavane, Lingaraju Gorla, Armando Ferrer<sup>a</sup>, Belen Altava, M. Ángeles Izquierdo, M. Isabel Burguete and Santiago V. Luis\***

*Department of Inorganic and Organic Chemistry, University Jaume I, Avda. Sos Baynat s/n., 12071 Castellón, Spain, Fax: +34 964 72 8214, Tel: 964728239; E-mail: luiss@uji.es*

*<sup>a</sup> Permanent address: Departamento de Química, Facultad de Ciencias Naturales, Universidad de Oriente, Avda. Patricio Lumumba s/n., 90500 Santiago de Cuba, Cuba; E-mail: aferrer@cnt.uo.edu.cu*

---

## S1 Potential protonation equilibria for pseudopeptide 2.

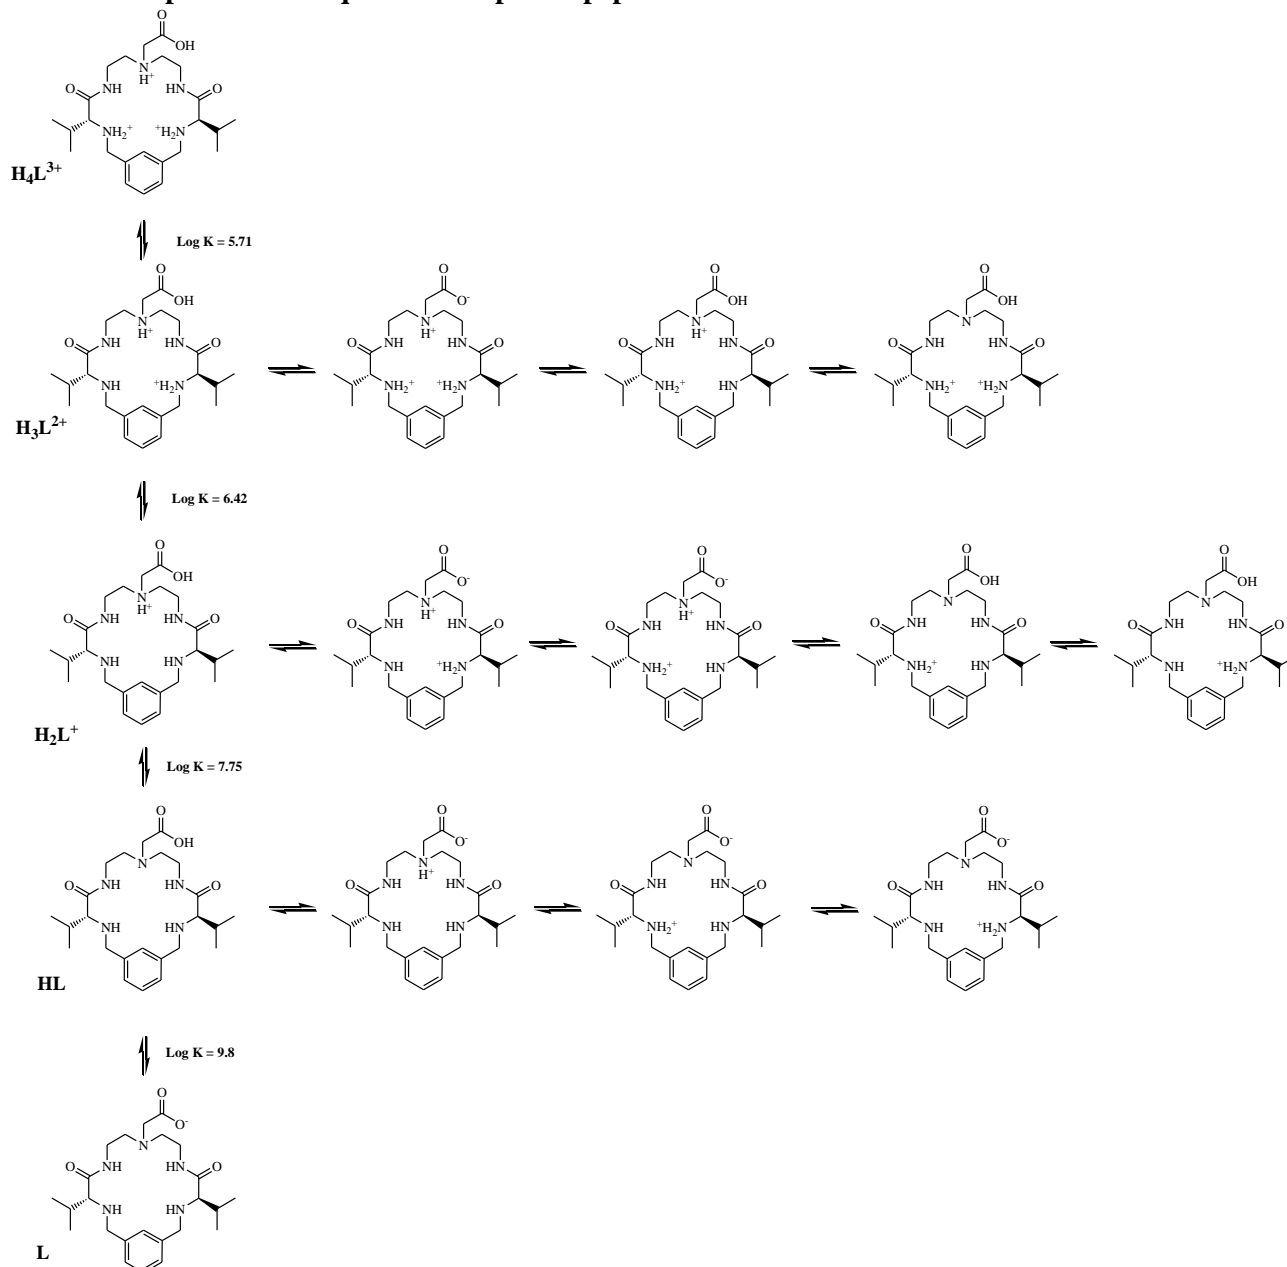

## S2 Proton induced shifts for Compound 1 upon changing pH

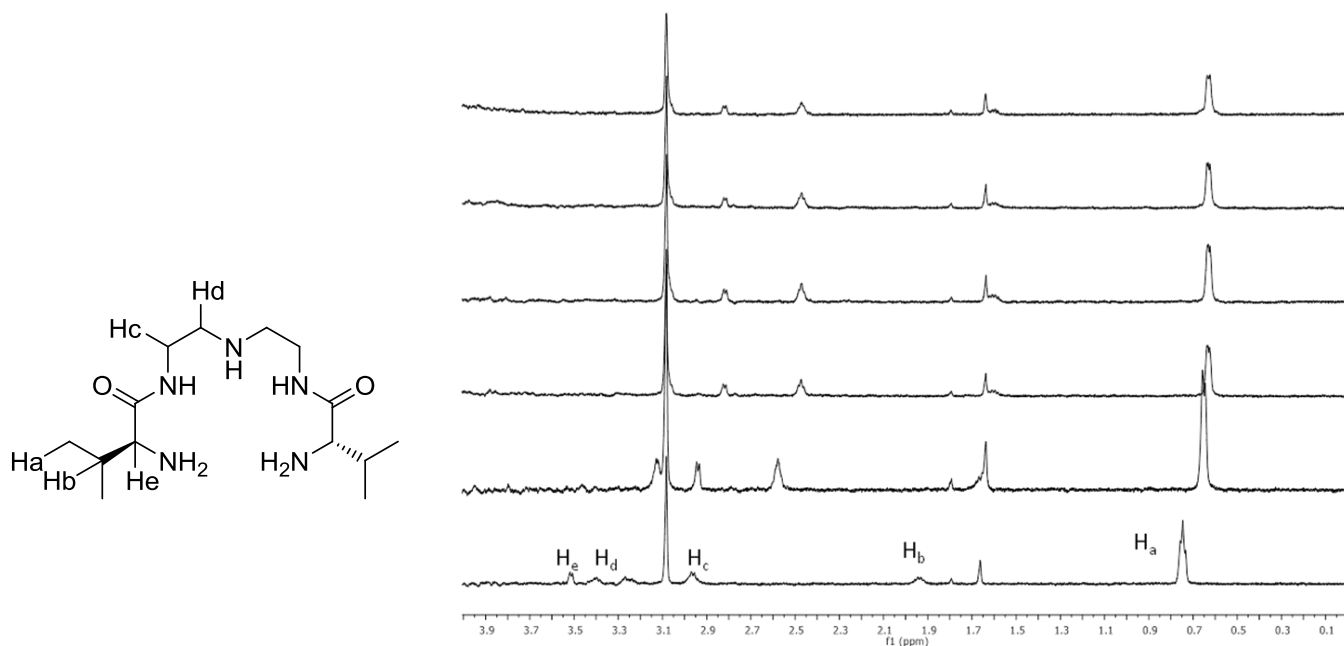

<sup>1</sup>H NMR of compound **1** (1 mM) at different pH values in H<sub>2</sub>O/D<sub>2</sub>O 9:1 (from top to bottom, pH values are: 11.3; 10.3; 9.1; 8.6; 6.9 and 5.3).

## S3. ESI-MS spectra for Cu (II) complexes.

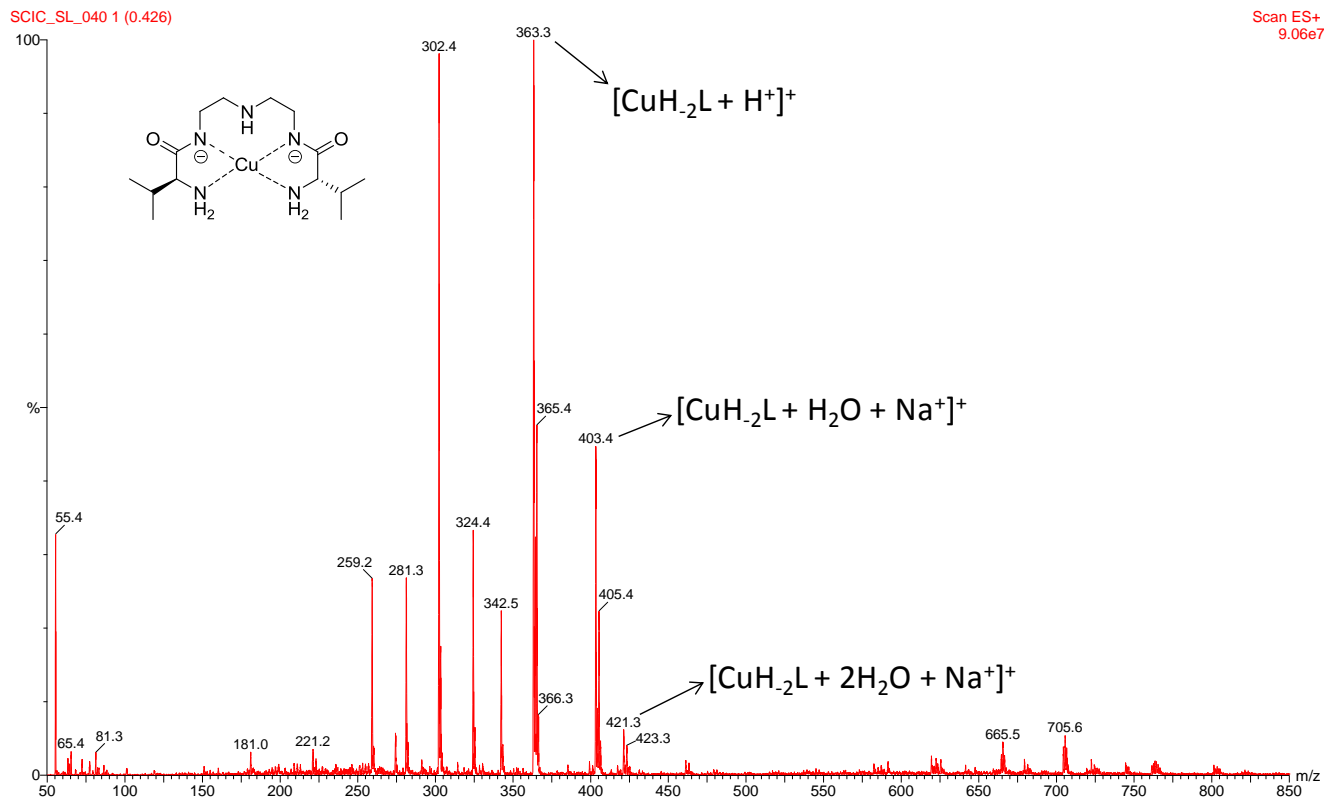

ESI-MS for **1**+Cu at pH 9.0.

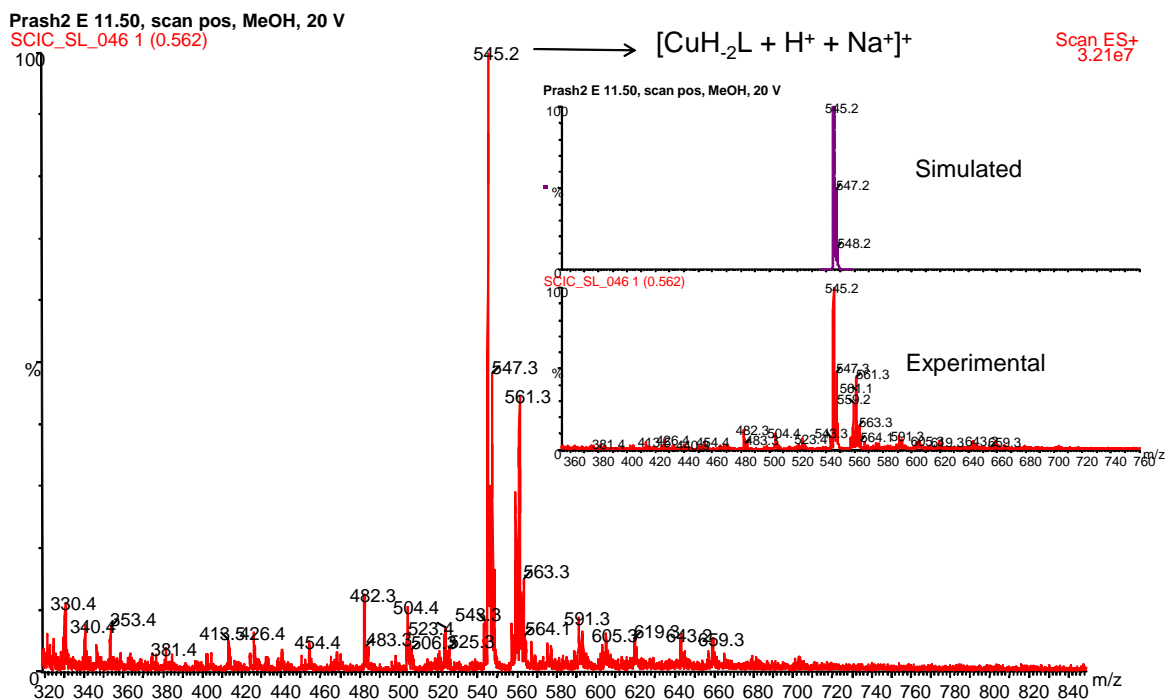

ESI-MS for **2**+Cu at pH 11.5. The species  $[\text{CuH}_2\text{L} + \text{H}^+ + \text{Na}^+]^+$  is monocationic taking into consideration that **L** for **2** has been defined as a monoanionic species.

#### S4. Theoretical studies for Cu(II) Complexes

The calculations were carried out with the program Spartan'14 (version 1.1.0), using the Monte Carlo conformational search performed at the Merck molecular force field (MMFF). The most stable conformers obtained in the conformational search were then optimized by means of density functional theory using the non local hybrid Becke's three-parameter exchange functional (denoted as B3LYP) with LanL2DZ pseudopotential and the associated basis set for Cu and the 6-31G(d) basis set for the rest of atoms using the Gaussian 09 program. The stationary points have been characterized as true minima by the calculation of the normal vibration modes, being all the values positive.

Calculated **1+Cu** complex geometries for [CuH<sub>2</sub>L] species

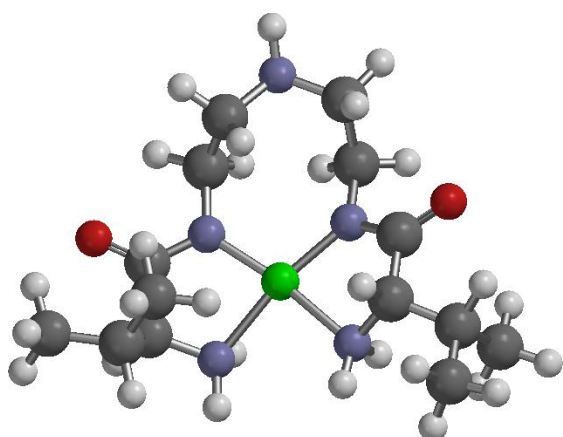

square planar

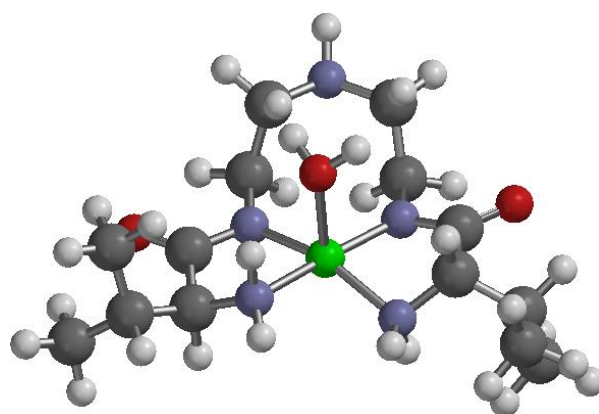

pyramidal

|                          | Square planar | Pyramidal |
|--------------------------|---------------|-----------|
| <b>d (N1-Cu)</b>         | 1.851 Å       | 1.877 Å   |
| <b>d (N2-Cu)</b>         | 1.865 Å       | 1.879 Å   |
| <b>d (N3-Cu)</b>         | 2.067 Å       | 2.067 Å   |
| <b>d (N4-Cu)</b>         | 2.090 Å       | 2.089 Å   |
| <b>d (O1-Cu)</b>         | -             | 2.179 Å   |
| <b>d (O2-Cu)</b>         | -             | -         |
| <b>a (N1-Cu-N2)</b>      | 105.8°        | 106.9 °   |
| <b>a (N2-Cu-N4)</b>      | 83.3°         | 83.7 °    |
| <b>a (N1-Cu-N3)</b>      | 85.3 °        | 84.2 °    |
| <b>a (N3-Cu-N4)</b>      | 85.9 °        | 87.2 °    |
| <b>planar distortion</b> | 6.1°          | 15.2°     |
| <b>Relative energy*</b>  | 1.9           | 0.0       |

\*Energy difference in kcal/mol

Calculated  $2+\text{Cu}$  complex geometries for  $[\text{CuH}_2\text{L}]$  species

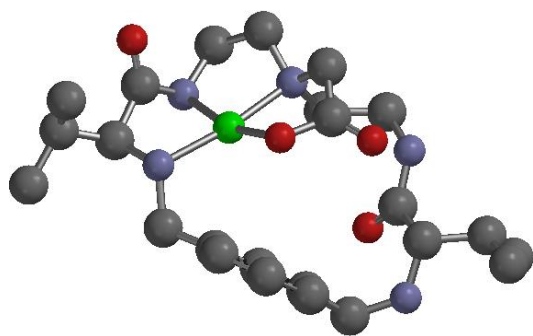

**A**

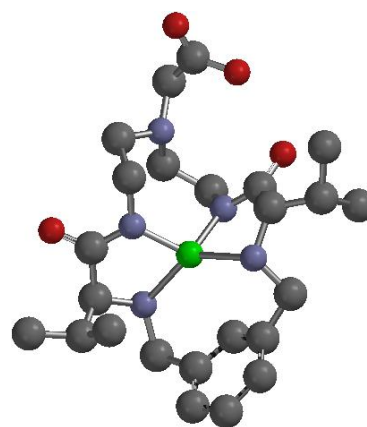

**B**

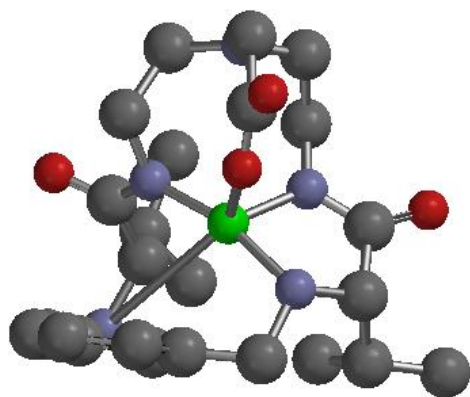

**C**

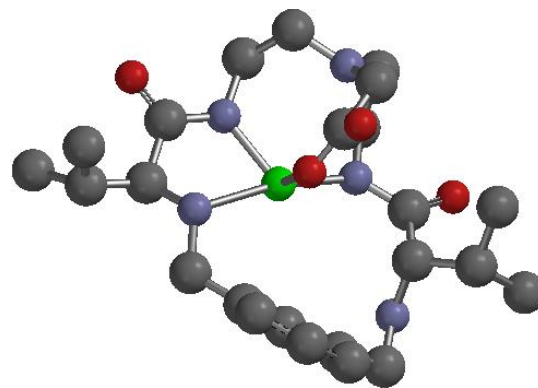

**D**

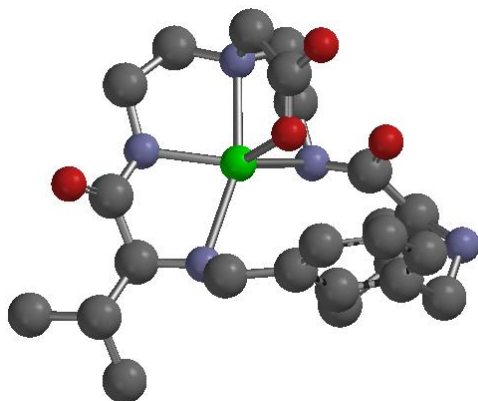

**E**

|                         | A       | B       | C       | D       | E       |
|-------------------------|---------|---------|---------|---------|---------|
| <b>d (N1-Cu)</b>        | 2.171 Å | 1.839 Å | 1.865 Å | 2.035 Å | 2.091 Å |
| <b>d (N2-Cu)</b>        | -       | 1.838 Å | 1.845 Å | 2.047 Å | 2.127 Å |
| <b>d (N3-Cu)</b>        | 2.025 Å | 2.327 Å | 2.076 Å | 2.431 Å | 2.339 Å |
| <b>d (N4-Cu)</b>        | -       | 2.213 Å | 4.103 Å | -       | -       |
| <b>d (N5-Cu)</b>        | 2.024 Å | -       | 2.113 Å | -       | 2.237 Å |
| <b>d (O-Cu)</b>         | 2.068 Å | -       | -       | 1.904 Å | 2.027 Å |
| <b>Relative energy*</b> | 7.6     | 0.9     | 3.7     | 2.5     | 0.0     |

\*Energy difference in kcal/mol
